# Supplementary material for: Building Individual Player Performance Profiles According to Pre-Game Expectations and Goal Difference in Soccer
Source: MDPI journal article supplement (doi:10.3390/s24051700), 2024-03-06
Supplement: s1 [file s1]

# Building Individual Player Performance Profiles According to Pre-Game Expectations and Goal Differences in Soccer

Arian Skoki <sup>1</sup>, Boris Gašparović <sup>1</sup>, Stefan Ivić <sup>2</sup>, Jonatan Lerga <sup>1,3\*</sup> and Ivan Štajduhar <sup>1,3</sup>

<sup>1</sup> Department of Computer Engineering, Faculty of Engineering, University of Rijeka, Vukovarska 58, 51000 Rijeka, Croatia; arian.skoki@riteh.uniri.hr (A.S.); boris.gasparovic@riteh.uniri.hr (B.G.); ivan.stajduhar@riteh.uniri.hr (I.Š.)

<sup>2</sup> Department of Fluid Mechanics, Faculty of Engineering, University of Rijeka, Vukovarska 58, 51000 Rijeka, Croatia; stefan.ivic@riteh.uniri.hr

<sup>3</sup> Center for Artificial Intelligence and Cybersecurity, University of Rijeka, R. Matejcic 2, 51000 Rijeka, Croatia

\* Correspondence: jonatan.lerga@riteh.uniri.hr

---

## S1. Comprehensive Results Analysis

To highlight the enhancement of the model compared to the baselines  $B_1$  and  $B_2$ , Table S1 displays the absolute error of the superior model using NM. The data demonstrate that the model surpasses both baselines for all players, with an average improvement of 6.9% over  $B_1$  and 4.79% over  $B_2$ .

The stability of the resultant vectors generated by both PSO and NM was assessed by running each optimization procedure ten times. Table S2 displays the mean and standard deviation values of the final cost function. Notably, both algorithms consistently converge to the final solution across all iterations, as indicated by the minimal standard deviation. Although there are slight variations in the number of evaluations required to reach the optimal solution, these deviations fall within the expected range. These findings underscore the robustness of the proposed approach.

In conclusion, Figure S1 offers an overview of all players and matches included in the study, comparing calculated values to the real ones. This visualization encapsulates the entirety of the analysis conducted.

---

**Table S1.** Comparison of NM model vs. baselines  $B_1$  (mean) and  $B_2$  (median), displaying the absolute error for each player. The proposed model consistently outperforms both baselines across all players, showcasing a mean difference of  $-7.19\%$  for  $B_1$  and  $-4.79\%$  for  $B_2$ . Values in bold indicate the best-performing approaches with the lowest errors.

| Player    | $AE_{NM}$        | $AE_{B_1}$ | $AE_{B_2}$ | Model vs. $B_1 \epsilon$ | Model vs. $B_2 \epsilon$ |
|-----------|------------------|------------|------------|--------------------------|--------------------------|
| athlete1  | <b>181848.4</b>  | 196257.0   | 194186.0   | <b>-7.34%</b>            | <b>-6.35%</b>            |
| athlete2  | <b>201158.89</b> | 207123.0   | 204857.0   | <b>-2.88%</b>            | <b>-1.81%</b>            |
| athlete3  | <b>192716.72</b> | 212172.0   | 209929.0   | <b>-9.17%</b>            | <b>-8.2%</b>             |
| athlete4  | <b>154328.89</b> | 164862.0   | 163497.0   | <b>-6.39%</b>            | <b>-5.61%</b>            |
| athlete5  | <b>158710.3</b>  | 163590.0   | 158899.0   | <b>-2.98%</b>            | <b>-0.12%</b>            |
| athlete6  | <b>215514.32</b> | 231386.0   | 221867.0   | <b>-6.86%</b>            | <b>-2.86%</b>            |
| athlete7  | <b>204385.48</b> | 210075.0   | 206633.0   | <b>-2.71%</b>            | <b>-1.09%</b>            |
| athlete8  | <b>146735.51</b> | 154482.0   | 151935.0   | <b>-5.01%</b>            | <b>-3.42%</b>            |
| athlete9  | <b>114652.47</b> | 124830.0   | 121886.0   | <b>-8.15%</b>            | <b>-5.93%</b>            |
| athlete10 | <b>62925.13</b>  | 66654.0    | 66047.0    | <b>-5.59%</b>            | <b>-4.73%</b>            |
| athlete11 | <b>78828.56</b>  | 100069.0   | 109100.0   | <b>-21.23%</b>           | <b>-27.75%</b>           |
| athlete12 | <b>33806.67</b>  | 36950.0    | 35137.0    | <b>-8.51%</b>            | <b>-3.79%</b>            |
| athlete13 | <b>183325.78</b> | 189136.0   | 187627.0   | <b>-3.07%</b>            | <b>-2.29%</b>            |
| athlete14 | <b>145499.14</b> | 148588.0   | 143636.0   | <b>-2.08%</b>            | <b>-1.3%</b>             |
| athlete15 | <b>134646.25</b> | 144411.0   | 141562.0   | <b>-6.76%</b>            | <b>-4.89%</b>            |
| athlete16 | <b>37304.38</b>  | 40011.0    | 38476.0    | <b>-6.76%</b>            | <b>-3.05%</b>            |
| athlete17 | <b>38677.18</b>  | 44818.0    | 43868.0    | <b>-13.7%</b>            | <b>-11.83%</b>           |
| athlete18 | <b>35201.96</b>  | 36948.0    | 36458.0    | <b>-4.73%</b>            | <b>-3.45%</b>            |
| athlete19 | <b>26778.8</b>   | 28854.0    | 25547.0    | <b>-7.19%</b>            | <b>-4.82%</b>            |
|           |                  |            |            | $\mu=-6.9\%$             | $\mu=-4.79\%$            |

**Table S2.** Convergence stability of both PSO and NM methods over ten runs for all players. The data presented include the mean and standard deviations of the final cost function results across the runs ( $run, \epsilon$ ), along with the number of evaluations conducted throughout these runs ( $run, eval$ ).

| Player    | $PSO_{run, \epsilon}$ |          | $NM_{run, \epsilon}$ |          | $PSO_{run, eval}$ |          | $NM_{run, eval}$ |          |
|-----------|-----------------------|----------|----------------------|----------|-------------------|----------|------------------|----------|
|           | $\mu$                 | $\sigma$ | $\mu$                | $\sigma$ | $\mu$             | $\sigma$ | $\mu$            | $\sigma$ |
| athlete1  | 51294.02              | 214.51   | 52555.57             | 2809.51  | 4859              | 1597     | 2660             | 1870     |
| athlete2  | 54503.55              | 54.7     | 55470.82             | 3207.25  | 6139              | 2414     | 3317             | 3739     |
| athlete3  | 48086.41              | 1483.52  | 48372.94             | 2543.17  | 4620              | 1445     | 1566             | 443      |
| athlete4  | 61708.33              | 24.56    | 63663.91             | 2710.29  | 6425              | 3591     | 3627             | 4580     |
| athlete5  | 51326.06              | 207.2    | 55037.96             | 8095.42  | 6334              | 2814     | 3574             | 3527     |
| athlete6  | 86397.37              | 119.84   | 86331.36             | 13.39    | 5267              | 1198     | 1939             | 383      |
| athlete7  | 68422.6               | 39.5     | 70558.34             | 3553.95  | 5585              | 2190     | 2304             | 902      |
| athlete8  | 39521.77              | 2218.21  | 39458.72             | 2140.44  | 6048              | 4963     | 2095             | 508      |
| athlete9  | 55916.96              | 77.25    | 56620.64             | 1831.9   | 5071              | 1933     | 2139             | 483      |
| athlete10 | 52627.32              | 427.0    | 54912.22             | 6457.15  | 5704              | 2408     | 1909             | 729      |
| athlete11 | 112301.9              | 79.7     | 112256.8             | 18.56    | 5331              | 2092     | 2467             | 2108     |
| athlete12 | 53582.16              | 3.47     | 53985.72             | 1278.91  | 2456              | 441      | 2671             | 2163     |
| athlete13 | 42849.12              | 18.18    | 46627.51             | 5172.77  | 5646              | 2527     | 2362             | 2205     |
| athlete14 | 71012.21              | 2711.95  | 77567.53             | 21769.11 | 6008              | 3627     | 4160             | 3992     |
| athlete15 | 46336.36              | 30.48    | 46347.77             | 66.64    | 4453              | 847      | 2028             | 395      |
| athlete16 | 27242.66              | 10.93    | 27232.54             | 0.08     | 5385              | 2809     | 2125             | 392      |
| athlete17 | 61759.87              | 49.33    | 62548.22             | 2574.02  | 4460              | 2603     | 1956             | 721      |
| athlete18 | 35532.76              | 11.0     | 35525.45             | 0.21     | 3320              | 363      | 1329             | 629      |
| athlete19 | 98801.18              | 7.31     | 101259.98            | 6156.62  | 4084              | 1709     | 2001             | 300      |

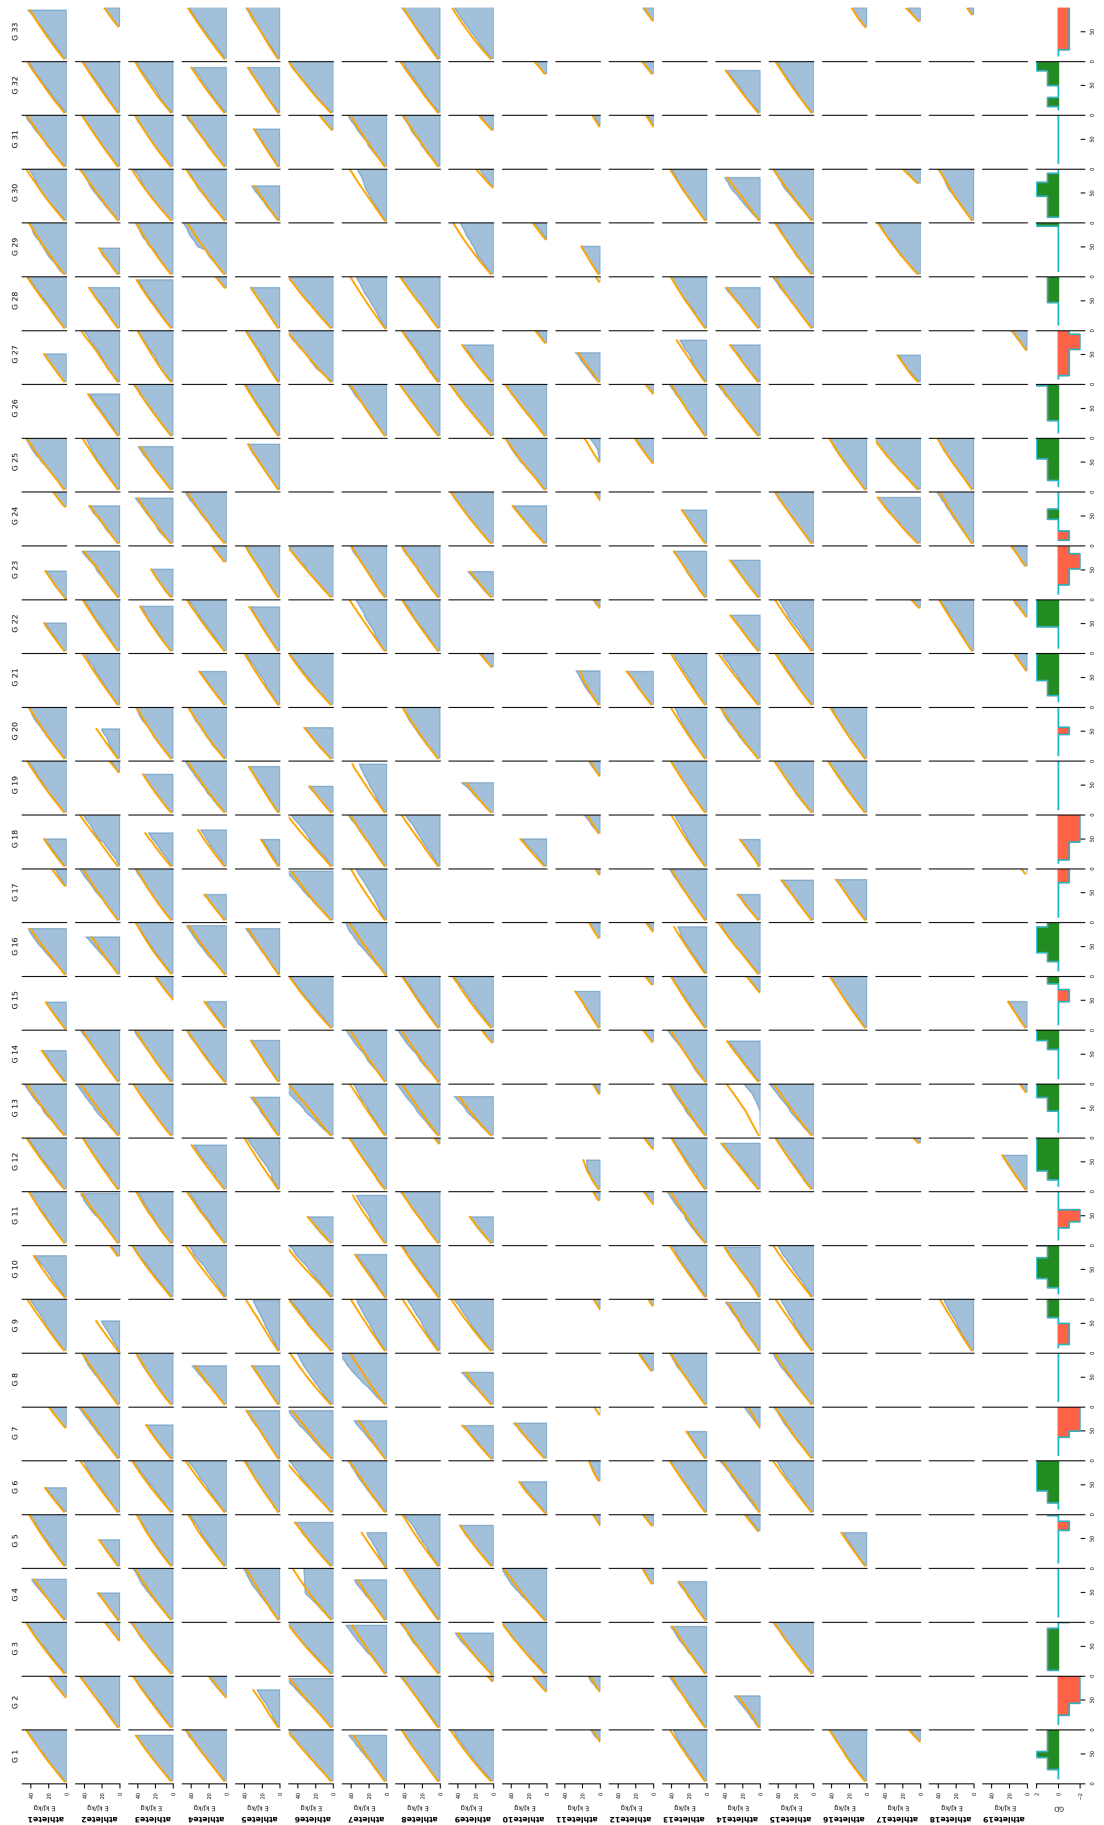

**Figure S1.** Overview of all the games and players used in the study. Columns represent individual games (G1–G33), while rows correspond to players (athlete1–athlete19), with the last row indicating GD across 90 minutes for each observed game. The negative GD values are highlighted in red, and positive values in green. The orange line reflects calculated values using the proposed model, and the blue area illustrates real values measured via sensors.
